## **Title**

Arterial Oxygen and Carbon Dioxide Tension and Acute Brain Injury in Extracorporeal Cardiopulmonary Resuscitation Patients: Analysis of the Extracorporeal Life Support Organization Registry

## **Short Title**

PaCO<sub>2</sub>, PaO<sub>2</sub>, and Acute Brain Injury in ECPR

## **Authors**

Benjamin L Shou, BS<sup>1\*</sup>, Chin Siang Ong, MBBS, PhD<sup>2\*</sup>, Lavienraj Premraj, BMsc<sup>3,4</sup>, Patricia Brown, RD-AP, LDN, CNSC<sup>1</sup>, Joseph E. Tonna, MD<sup>5</sup>, Heidi J Dalton, MD<sup>6</sup>, Bo Soo Kim, MD<sup>7</sup>, Steven P Keller, MD, PhD, MPhil<sup>7,8</sup>, Glenn JR Whitman, MD<sup>1</sup>, Sung-Min Cho, DO, MHS<sup>1, 9#</sup>

\*BLS and CSO contributed equally as co-first authors.

## **Institutions / Affiliations**

1. Division of Cardiac Surgery, Department of Surgery, Johns Hopkins University School of Medicine
2. Division of Surgical Outcomes, Department of Surgery, Yale School of Medicine
3. Griffith University School of Medicine, Gold Coast, Queensland, Australia
4. Critical Care Research Group, The Prince Charles Hospital, Brisbane, Queensland, Australia

5. Division of Cardiothoracic Surgery, Department of Surgery; Department of Emergency Medicine, University of Utah Health
6. Adult and Pediatric Extracorporeal Life Support, INOVA Fairfax Medical Center
7. Division of Pulmonary and Critical Care Medicine, Johns Hopkins University School of Medicine
8. Department of Biomedical Engineering, Johns Hopkins University, Baltimore, MD
9. Division of Neuroscience Critical Care, Departments of Neurology, Neurosurgery, Anesthesia and Critical Care Medicine, Johns Hopkins University School of Medicine

**Corresponding Author#**

Sung-Min Cho, DO, MHS

Division of Neuroscience Critical Care

Division of Cardiac Surgery

Departments of Neurology, Neurosurgery, Surgery, Anesthesia and Critical Care  
Medicine

Johns Hopkins University

600 N. Wolfe Street, Phipps 455

Baltimore, MD 21287

Email: [csungmi1@jhmi.edu](mailto:csungmi1@jhmi.edu)

**Author Contributions:**

All authors contributed to the study conception and design. Data preparation and analysis were performed by Benjamin Shou and Chin Siang Ong. The first draft of the

manuscript was written by Benjamin Shou, Chin Siang Ong, and Lavienraj Premraj. All authors provided feedback and approved the final manuscript. Primary supervision by Sung-Min Cho.

## **Abstract** (275/300 words)

### **Objective**

Acute brain injury remains common after extracorporeal cardiopulmonary resuscitation. Using a large international multicenter cohort, we investigated the impact of pericannulation arterial oxygen (PaO<sub>2</sub>) and carbon dioxide (PaCO<sub>2</sub>) on ABI occurrence.

### **Design**

Retrospective cohort study.

### **Setting**

Data in the Extracorporeal Life Support Organization Registry from 2009 to 2020.

### **Patients**

Adult patients (≥18 years old) who underwent extracorporeal cardiopulmonary resuscitation.

### **Interventions**

None.

### **Measurements and Main Results**

Of 3,125 patients with extracorporeal cardiopulmonary resuscitation (median age=58, 69% male), 488 (16%) experienced at least one form of acute brain injury, which included ischemic stroke, intracranial hemorrhage, seizures, and brain death. 217 (7%) experienced ischemic stroke and 88 (3%) experienced intracranial hemorrhage. The registry collects two blood gas data pre- (6 hours before) and on- (24 hours after) extracorporeal membrane oxygenation (ECMO) cannulation. Blood gas parameters were classified as: hypoxia (<60mmHg), normoxia (60-119mmHg), and mild (120-199mmHg), moderate (200-299mmHg), and severe hyperoxia (≥300mmHg); hypocarbia

(<35mmHg), normocarbica (35-44mmHg), mild (45-54mmHg) and severe hypercarbia ( $\geq 55$ mmHg). In multivariable logistic regression analysis, pre-ECMO hypoxia (aOR=1.46, 95%CI: 1.03-2.08, p=0.04) and on-ECMO severe hyperoxia (aOR=1.55, 95%CI: 1.02-2.36, p=0.04) were associated with composite ABI. Also, on-ECMO severe hyperoxia was associated with intracranial hemorrhage (aOR=1.88, 95%CI: 1.02-3.47, p=0.04) and in-hospital mortality (aOR=3.51, 95%CI: 1.98-6.22, p<0.001). Pre- and on-ECMO PaCO<sub>2</sub> levels were not significantly associated with composite ABI or mortality, though mild hypercarbia pre- and on-ECMO were protective of ischemic stroke and intracranial hemorrhage, respectively.

## **Conclusions**

Early severe hyperoxia ( $\geq 300$ mmHg) on ECMO was a significant risk factor for acute brain injury and mortality for patients undergoing extracorporeal cardiopulmonary resuscitation. Careful consideration should be given in early oxygen delivery in ECPR patients who are at risk of reperfusion injury.

**Keywords:** Neurological Injury; Extracorporeal Membrane Oxygenation; ECPR

## Introduction

Extracorporeal cardiopulmonary resuscitation (ECPR) combines venoarterial extracorporeal membrane oxygenation (VA-ECMO) and cardiopulmonary resuscitation (CPR) as a rescue therapy for patients with refractory cardiac arrest. Though ECPR use has rapidly increased(1) and may improve survival outcome compared to conventional CPR(2,3), acute brain injury (ABI) commonly occurs in as many as 27-32%(4,5) of patients, leading to poor neurological outcome(3,6). Primary ABI is caused by global brain ischemia during cardiac arrest. In contrast, secondary ABI occurs as a consequence of ECMO support; the immediate cerebral blood flow restoration results in reperfusion injury(7). Cerebral reperfusion injury may be compounded by aggressive oxygen therapy and acute changes in carbon dioxide during peri-cannulation period(7–9). ABI is not only a significant cause of morbidity, but also portends an increase in mortality in ECMO patients(10,11).

Although the exact mechanisms behind ABI during ECMO support remain to be elucidated, acute changes in arterial carbon dioxide ( $\text{PaCO}_2$ ) and oxygen tension ( $\text{PaO}_2$ ) have plausible mechanisms to cause ABI.  $\text{PaCO}_2$  serves as a key regulator of cerebral autoregulation(12) and neuronal metabolic demand(13), and rapid decreases in  $\text{PaCO}_2$  may cause ABI by the combined effect of increased neuronal excitability with decreased cerebral blood flow. Though tissue hypoxia is widely known to be injurious, hyperoxia and resulting toxicity from increased free radical formation is also detrimental, especially after rapid reperfusion(14). Both  $\text{PaCO}_2$  and  $\text{PaO}_2$  have previously been associated with ABI and mortality in VA- and venovenous (VV-) ECMO patients, but these findings have not been well studied in ECPR patients(15). As clinical experience

accumulates and ECPR becomes widely used, focused research on management of neurologic complications and on-ECMO care such as optimal oxygen and carbon dioxide level is imperative to improve neurological outcomes of ECPR patients; however, evidence regarding this is currently sparse.

In this study, we utilized the Extracorporeal Life Support Organization (ELSO) registry to examine the relationship between peri-cannulation PaCO<sub>2</sub> and PaO<sub>2</sub> levels on occurrence of ABI in patients receiving ECPR. We hypothesized that greater degree of peri-cannulation CO<sub>2</sub> removal and severity of hyperoxia after ECMO initiation are associated with ABI.

## **Materials and Methods**

### ***Study Design and Population***

This study was approved by the Johns Hopkins Institutional Review Board with a waiver of informed consent. The ELSO Registry is a voluntary database that collects clinical information and outcomes of ECMO support in adults and children from >500 member centers worldwide(16). The registry collects demographics, pre-ECMO medical diagnoses, hemodynamic and laboratory values before and during ECMO support, complications during ECMO support including ABI, and outcome such as survival to hospital discharge. Diagnosis and medical history are reported according to the International Classification of Diseases, 9th Edition and 10th Edition codes.

A retrospective analysis of ECPR patients in the ELSO database from January 2009 to December 2020 was performed. The inclusion criteria were 1) patients 18 years old and older; and 2) patients who received one run of ECMO support for ECPR

indication. We excluded 1) patients who underwent multiple runs to avoid complexity and bias of confounding the outcome data; and 2) patients treated with non-ECPR VA-ECMO and VV-ECMO.

### ***Data Collection and Definitions***

ECPR is defined in the ELSO registry as the rapid deployment of VA-ECMO in the setting of unsuccessful conventional cardiopulmonary resuscitation(17). The ELSO case report form collects hemodynamic and arterial blood gas (ABG) values before and after ECMO cannulation (“pre-ECMO” and “on-ECMO”, respectively). The pre-ECMO ABG value is the closest measurement to cannulation in the 6 hours before ECMO initiation. The on-ECMO value is the closest value to 24 hours after cannulation but could be taken at any time in hours 18-30 after cannulation. Delta PaO<sub>2</sub> (rise in PaO<sub>2</sub> over 24 hours) is defined as on-ECMO PaO<sub>2</sub> minus pre-ECMO PaO<sub>2</sub>. Delta PaCO<sub>2</sub> (change in PaCO<sub>2</sub> over 24 hours) is defined as on-ECMO PaCO<sub>2</sub> minus pre-ECMO PaCO<sub>2</sub>. Relative delta PaO<sub>2</sub> and PaCO<sub>2</sub> were defined as the delta value divided by the pre-ECMO blood gas value. Physiologically improbable data values under the following conditions were treated as erroneous values: pH>8.0 or <6.5, PaO<sub>2</sub>>760, and PaCO<sub>2</sub>>240 or <20 mmHg. PaO<sub>2</sub> and PaCO<sub>2</sub> categories were defined as following: hypoxia (<60 mmHg PaO<sub>2</sub>), normoxia (60-119) mmHg, mild hyperoxia (120-199) mmHg, moderate hyperoxia (200-299) mmHg, severe hyperoxia (>300 mmHg), hypocarbia (<35 mmHg PaCO<sub>2</sub>), normocarbia (35-44 mmHg), mild hypercarbia (45-54 mmHg), and severe hypercarbia (>55 mmHg). Numerical cutoffs for categories were determined based on standard clinical practice and prior literature(8).



Various ECMO complications were also included in the study. ECMO circuit mechanical failure includes any component or equipment failures which require intervention, such as replacement. Renal replacement therapy includes the use of any dialysis or hemofiltration while on ECMO. Hemolysis was defined as free plasma hemoglobin >50 mg/dL. Gastrointestinal (GI) hemorrhage included any upper or lower GI bleeding requiring packed red blood cell or whole blood transfusion, endoscopic intervention, or use of a hemostatic agent.

We defined composite acute brain injury (ABI) to include ischemic stroke, intracranial hemorrhage (ICH), diffuse brain ischemia, brain death, seizure, and ABI requiring neurosurgical intervention. In the ELSO database, ischemic stroke is defined as central nervous system (CNS) infarction as confirmed by ultrasound, computed tomography (CT), or magnetic resonance imaging (MRI). ICH is comprised of intra- or extra-parenchymal CNS hemorrhage as confirmed by ultrasound, CT, or MRI, or any CNS other hemorrhage, including intraventricular hemorrhage. Subtypes of ICH, such as intracerebral, subarachnoid, or subdural hematoma, were not available in the database. Seizure included those detected by clinical assessment or electroencephalogram. Those with ischemia, intraventricular hemorrhage, and neurosurgical intervention, which were added as variables to the ELSO database in 2019 and after, were included as part of the ABI group.

### ***Outcomes***

The primary outcome was composite ABI. The secondary outcomes were ischemic stroke, ICH, and mortality.

### ***Statistical Analysis***

Continuous variables were expressed as medians with interquartile range (IQR). Categorical variables were expressed as frequencies with percentages. Wilcoxon rank-sum and Pearson's chi-squared tests were used to compare continuous and categorical variables, respectively. Cuzick's non-parametric test was used to assess for trends over time(18). P values < 0.05 were considered statistically significant.

Univariable and multivariable logistic regression were performed to determine associations between PaO<sub>2</sub>/PaCO<sub>2</sub> metrics and 1) ABI, 2) ischemic stroke, 3) ICH, and 4) mortality. Variables which had a p<0.05 by univariable analysis were included in the initial multivariable regression model. Different permutations of PaO<sub>2</sub>/PaCO<sub>2</sub> metrics were added to assess improvements in model performance. PaO<sub>2</sub>/PaCO<sub>2</sub> metrics included in different models were categorized PaO<sub>2</sub>/PaCO<sub>2</sub> values, as above, PaO<sub>2</sub>/PaCO<sub>2</sub> as a continuous variable, delta, and relative delta PaO<sub>2</sub>/PaCO<sub>2</sub>. The models with the lowest Akaike's information criterion (AIC) were selected as the final models. The final model for ABI (primary outcome) was adjusted for the following pre-ECMO characteristics based on these variables being statistically significant in univariable regression: age, race, pre-ECMO pH and lactate, requirement of renal replacement therapy, hemorrhagic hemolysis, and on-ECMO arrhythmia. Adjusted odds ratios (aOR) were presented with 95% confidence intervals (CIs). Statistical significance was set at p<0.05. All analyses were carried out in STATA 17 (StataCorp, LLP, College Station, TX).

## **Results**

### ***Incidence and Mortality of ABIs***

Of 3,125 patients (median age=58, 69% male) who underwent ECPR intervention, 488 (16%) experienced ABI. The most common type of ABI was ischemic stroke (n=217, 7%), brain death (n=183, 6%), ICH (n=88, 3%), and seizures (n=69, 2%). Except for a decrease in 2020, the use of ECPR has steadily increased over time from 36 patients in 2009 to 677 in 2019 (p-trend=0.003) (**Figure 1A**). The incidence of composite ABI among ECPR patients has decreased over time (p-trend=0.02). However, the incidence of ischemic stroke has increased while ICH has remained stable (**Figure 1B**). Those with ABI (88% vs. 65%), ischemic stroke (84% vs. 68%), and ICH (89% vs. 68%) had higher mortality compared to those without (p<0.001 for all).

### ***Arterial Oxygen Tension and ABI***

Patients with ABI had a lower median pre-ECMO PaO<sub>2</sub> compared to those without (73 mmHg vs. 77, p=0.02) (**Table 1**). Following ECMO initiation, those with ABI had a higher PaO<sub>2</sub> (156 vs. 133 mmHg, p<0.001) and delta PaO<sub>2</sub> (+84 vs. +50 mmHg, p<0.001), and were more likely to have moderate (13% vs. 10%, p=0.003) or severe hyperoxia (22% vs. 15%, p=0.003). Additionally, ABI patients had a higher relative delta PaO<sub>2</sub> (+112% vs. +67%, p<0.001). Distributions of on-ECMO PaO<sub>2</sub> and PaCO<sub>2</sub> are plotted in **Figure 2**. There was a U-shaped relationship between oxygenation status and frequency of composite ABI, ischemic stroke, and ICH (**Figures S1A, S1C, S1E**). Compared to other types of ABI, those with ICH experienced the largest increase in PaO<sub>2</sub> as well as highest on-ECMO PaO<sub>2</sub> (**Figure S2**).

### ***Arterial Carbon Dioxide Tension and ABI***

Those with ABI had a higher pre-ECMO PaCO<sub>2</sub> (51 vs. 48 mmHg, p=0.01), were more likely to have severe hypercarbia (46% vs. 37%, p<0.001), and less likely to have mild

hypercarbia (15% vs. 22%,  $p < 0.001$ ) prior to ECMO initiation (**Table 1**). There were no differences in PaCO<sub>2</sub> between those with and without ABI after ECMO initiation, however, the ABI group had a marginally larger delta PaCO<sub>2</sub> (-12 vs. -11 mmHg,  $p = 0.04$ ).

### ***Risk Factors of ABI***

#### *Composite ABI*

Differences in baseline characteristics, pre-ECMO, and ECMO variables between those with and without composite ABI are shown in **Table 1**. In the final multivariable model for composite ABI, lower pre-ECMO pH (aOR=1.13 per 0.1 unit drop, 95% CI: 1.03-1.25,  $p = 0.01$ ), pre-ECMO hypoxia (aOR=1.46, 95% CI: 1.03-2.08,  $p = 0.04$ ), on-ECMO severe hyperoxia (aOR=1.55, 95% CI: 1.02-2.36,  $p = 0.04$ ), and renal replacement therapy (aOR=1.70, 1.22-2.37,  $p = 0.002$ ) were significant risk factors of developing composite ABI (**Table 2, Figure 3A**). Delta PaO<sub>2</sub> and delta PaCO<sub>2</sub>, and relative deltas, were not significantly associated with ABI.

#### *Ischemic stroke*

We separately analyzed secondary outcomes, ischemic stroke and ICH. In a multivariable logistic regression model for ischemic stroke (**Figure 3B, Table S1**), older age (aOR=0.90 for every 10 year age increase, 95% CI: 0.80-0.99,  $p = 0.04$ ) and pre-ECMO mild hypercarbia (aOR=0.56, 95% CI: 0.34-0.92,  $p = 0.02$ ) were protective against ischemic stroke. In the same model, higher weight (for every 10 kg increase, aOR=1.10, 95% CI: 1.02-1.17,  $p = 0.008$ ), lower pre-ECMO pH (aOR=1.16 per 0.1 unit drop, 95% CI: 1.06-1.28,  $p = 0.001$ ), and renal replacement therapy during ECMO (aOR=2.03, 95% CI: 1.47-2.78,  $p < 0.001$ ) were associated with ischemic stroke.

## *ICH*

By multivariable logistic regression, (**Figure 3C, Table S2**), female sex (aOR=2.27, 95% CI: 1.41-3.66, p=0.001), atrial fibrillation (aOR=2.45, 95% CI: 1.12-5.36, p=0.03), and on-ECMO severe hyperoxia (aOR=1.88, 95% CI: 1.02-3.47, p=0.04) were associated with ICH. On-ECMO mild hypercarbia (aOR=0.39, 95% CI: 0.15-1.00, p=0.05) was protective against ICH.

## ***Risk Factors of Mortality***

There was a U-shaped relationship between both on-ECMO PaO<sub>2</sub> and delta PaCO<sub>2</sub> with mortality (**Figure S3**). In a multivariable model, those who had ABI had more than a four-fold increased adjusted odds of mortality (aOR=4.18, 95% CI: 2.28-7.64, p<0.001) (**Figure S4, Table S3**). Increasing age (aOR=1.28 for every 10 year increase, 95% CI: 1.13-1.45, p<0.001) and weight (for every 10 kg increase, aOR=1.08, 95%CI: 1.00-1.17, p=0.05), as well as on-ECMO lactate (aOR=1.12, 95% CI: 1.07-1.18, p<0.001), lower pre-ECMO mean blood pressure (for every 10 mmHg decrease, aOR=1.15, 95% CI: 1.07-1.24, p<0.001) and lower on-ECMO pH (aOR=1.29 per 0.1 unit drop, 95% CI: 1.05-1.59, p=0.02) were associated with mortality. Severe hyperoxia on-ECMO was strongly associated with mortality (aOR=3.51, 95% CI: 1.98-6.22, p<0.001), as were ECMO circuit mechanical failure (aOR=2.17, 95% CI: 1.17-4.01, p=0.01), renal replacement therapy (aOR=2.24, 95% CI: 1.44-3.48, p<0.001), and on-ECMO arrhythmia (aOR=2.56, 95% CI: 1.47-4.45, p=0.001). Similar to the ABI models, delta PaO<sub>2</sub> and delta PaCO<sub>2</sub>, and relative deltas, were not significantly associated with mortality.

## **Discussion**

Our analysis of 3,125 ECPR patients within the ELSO registry revealed that 16% experienced at least one type of ABI. Ischemic stroke (7%) was the most common type of ABI, followed by brain death (6%), ICH (3%) and seizure (2%). ABI is a consequential and common occurrence in patients receiving ECPR: a meta-analysis of 78 studies (2008-2019) showed similar prevalence of ischemic stroke, brain death and ICH, though overall prevalence of ABI was higher in that study (27%)(4). We observed an 18-fold increase in ECPR use between 2009 and 2019, as increasing evidence accumulates for the benefit of ECPR over conventional CPR(7). Rates of composite ABI and brain death decreased while frequency of cerebrovascular events, such as ischemic stroke and intracranial hemorrhage, remained unchanged (**Figure 1**). Since ECPR survival has improved in the modern era(4), these epidemiological data may point to better selection of patients who may benefit from ECPR as well as more standardized practice and experience(19) while the prevention and treatment of on-ECMO cerebrovascular complications remains a challenge.

In cardiac arrest patients, early and prolonged hyperoxia ( $\text{PaO}_2 > 300$  mmHg) is associated with mortality and poor neurological outcome after both conventional CPR(20) and during VA-ECMO (non-ECPR specific)(8). A retrospective analysis of adult ECPR patients within the ELSO database from 2010 to 2015 showed that moderate hyperoxia ( $\text{PaO}_2$  101-300 mmHg), but not severe hyperoxia ( $\text{PaO}_2 > 300$  mmHg), was associated with increased mortality(21). The current study is the first to utilize a large international ECPR cohort to demonstrate early severe hyperoxia is a strong risk factor of ABI, which contributes to significant mortality and morbidity after ECMO. Severe hyperoxia likely exacerbates reperfusion injury in ECPR by providing

greater substrate for toxic free radical formation(14) and subsequent derangements like neuronal metabolic failure(22) and a pro-inflammatory state(23). Given the clinical evidence and mechanistic plausibility of ABI caused by hyperoxia, we need clinical trials to determine optimal oxygenation targets within the first 24 hours after ECPR where ischemic reperfusion injury risk is highest.

Pre-ECMO hypoxia was also associated with increased risk of composite ABI but not with ischemic stroke or ICH individually. Cardiac arrest results in temporary global anoxia and low cerebral blood flow, so pre-ECMO hypoxia likely mediates hypoxic ischemic brain injury (HIBI) and subsequent brain death rather than increasing the risk of cerebrovascular events, which are likely on-ECMO complications. A meta-analysis of ECPR studies reported HIBI as the most common type of ABI (23%) by a substantial margin(4). Though HIBI is not explicitly recorded in the ELSO registry, our cohort had similarly high rates of brain death (38% of all ABI), majority of which may be caused by HIBI.

The role of hypercarbia in ECMO is contentious. On one hand, an analysis of VA-ECMO patients in the ELSO registry, PaCO<sub>2</sub> was associated with increased mortality at tensions <30 mmHg and >60 mmHg(24). On the other hand, Munshi et al. reported that mild hypercarbia (PaCO<sub>2</sub>>45 mmHg) was inversely associated with mortality (OR=0.78, 95% CI=0.32-1.93) in ECPR patients(21). In this study, did not find any associations between PaCO<sub>2</sub> and mortality. Regarding ABI, on-ECMO mild hypercarbia (45-54 mmHg) was protective against ICH while pre-ECMO mild hypercarbia protected against ischemic stroke. PaCO<sub>2</sub> may play a distinct physiological role in ECPR versus VA-ECMO. Hypercarbia is known to increase cerebral blood flow and, in a phase II

randomized controlled trial, was associated with lower serum levels of neuronal and glial injury biomarkers (serum neuron specific enolase and S100b) 24 hours post-cardiac arrest compared to normoxia in post-cardiac arrest patients(25). Thus, mild hypercarbia in peri-cannulation period may attenuate the risk of ABI.

Despite delta PaCO<sub>2</sub> in ABI patients being marginally higher than in non-ABI patients in univariate analysis, delta PaCO<sub>2</sub> was not significantly associated with ABI or mortality after adjustment. Neither sensitivity analysis nor categorization using ordinal analyses of PaCO<sub>2</sub> yielded meaningful trends. Prior studies with VA-ECMO patients are equivocal. With the benefit of protocolized neuromonitoring and frequent ABG collections, we have previously reported that large delta PaCO<sub>2</sub> in VA-ECMO patients was significantly associated with ICH (OR=2.69; 95% CI=1.18-6.13) but not with composite ABI or mortality(26). Diehl et al. found a PaCO<sub>2</sub> drop >20 mmHg was associated with mortality but not ABI in VA-ECMO(24). The lack of agreement suggests that peri-cannulation delta PaCO<sub>2</sub> may be a non-specific phenomenon, and PaCO<sub>2</sub> management strategies should be further explored in a prospective study with granular ABG data and sufficient sample size. Also, it's important to highlight that our study focused only on ECPR patients unlike other aforementioned studies.

We systematically investigated the risk factors for ABI, ABI subtypes, and mortality. In addition to pre-ECMO hypoxia and on-ECMO hyperoxia discussed above, lower pre-ECMO pH and requiring renal replacement therapy (RRT) on-ECMO were strongly associated with composite ABI. Pre-ECMO pH has been reported as an independent predictor of survival(27), with pH  $\geq$  7.0 being associated with better neurological outcome in ECPR patients(28). Especially in ECPR patients with severe



metabolic acidosis post-cardiac arrest, pre-ECMO pH is likely a function of the duration of cerebral anoxia/hypoxia prior to the arrest(28). RRT reflects acute renal failure from hemodynamic instability and lack of adequate perfusion, which are also risk factors for ABI(29). In our study, both lower pre-ECMO pH and post-ECMO RRT were also associated mortality. Obesity was also associated with ischemic stroke. Though the pathology underlying obesity contributes to the etiology of ischemic stroke by promoting pro-thrombotic and pro-inflammatory state(30,31), obese patients may also experience delays during cannulation with longer low flow time, which increases likelihood of ischemic ABI(4,32). The main risk factors for ICH were atrial fibrillation and on-ECMO hyperoxia, suggesting that anticoagulant use during VA-ECMO as well as reperfusion injury during ECMO may lead to hemorrhagic conversion of ischemic stroke(33).

The study has several limitations. This was a retrospective study. We did not have access to many Utstein style variables, which may be importantly related to our outcomes of interest. We lacked granular ABG data since the ELSO registry only collects one pre-ECMO and one on-ECMO value, which prevented us from assessing variability or temporal trends (such as rates of change or duration of hyperoxia). The ELSO registry does not collect anticoagulation data, which is an important risk factor of ICH that could not be adjusted in our analysis. Further, as suggested by previous studies, the lack of adjudication of neurological diagnosis and standardized neuromonitoring protocol across contributing centers likely underestimates ABI frequency(34). As the study was retrospective, the association between hyperoxia and ABI is not causal in the absence of information regarding the timing of ABI. Nonetheless, our study contributes significantly to the literature as it utilized a large

international cohort that was sufficiently powered to capture clinical practice variations across ECMO centers.

## **Conclusions**

In a large, international cohort of ECPR patients, we found severe hyperoxia ( $\geq 300$  mmHg) following ECMO initiation to be associated with acute brain injury and mortality. However, carbon dioxide levels on ECMO or its drop pre- vs. post-cannulation were not associated with composite ABI. Given the risk of reperfusion injury following cardiac arrest, early oxygen delivery practices in ECPR and optimal threshold warrants further study in a prospective trial.

**Acknowledgements:**

None.

**Sources of Funding:**

The authors do not have any conflicts of interest to declare. CSO is funded by the Hearts of ECMO, a nonprofit organization funding ECMO research. JET is supported by NHLBI (K23 HL141596). SPK is supported by NHLBI (5K08HL14332). SMC is supported by NHLBI (1K23HL157610).

**Disclosures:**

None.

## References

1. Richardson A (Sacha) C, Schmidt M, Bailey M, Pellegrino VA, Rycus PT, Pilcher D V. ECMO Cardio-Pulmonary Resuscitation (ECPR), trends in survival from an international multicentre cohort study over 12-years. *Resuscitation* [Internet]. 2017 Mar 1 [cited 2022 Jan 25];112:34–40. Available from: <https://pubmed.ncbi.nlm.nih.gov/27993632/>
2. Thiagarajan RR, Brogan T V., Scheurer MA, Laussen PC, Rycus PT, Bratton SL. Extracorporeal Membrane Oxygenation to Support Cardiopulmonary Resuscitation in Adults. *Ann Thorac Surg* [Internet]. 2009 Mar 1 [cited 2021 Jul 23];87(3):778–85. Available from: <http://www.annalsthoracicsurgery.org/article/S0003497508027483/fulltext>
3. Ahn C, Kim W, Cho Y, Choi KS, Jang BH, Lim TH. Efficacy of extracorporeal cardiopulmonary resuscitation compared to conventional cardiopulmonary resuscitation for adult cardiac arrest patients: A systematic review and meta-analysis. *Sci Rep* [Internet]. 2016;6(May):1–8. Available from: <http://dx.doi.org/10.1038/srep34208>
4. Migdady I, Rice C, Deshpande A, Hernandez A V., Price C, Whitman GJ, et al. Brain Injury and Neurologic Outcome in Patients Undergoing Extracorporeal Cardiopulmonary Resuscitation: A Systematic Review and Meta-Analysis. *Crit Care Med*. 2020;E611–9.
5. Podell JE, Krause EM, Rector R, Hassan M, Reddi A, Jaffa MN, et al. Neurologic Outcomes After Extracorporeal Cardiopulmonary Resuscitation. *ASAIO J*. 2021;Publish Ah:12–4.

6. Chang WT, Wang CH, Lai CH, Yu HY, Chou NK, Wang CH, et al. Optimal Arterial Blood Oxygen Tension in the Early Postresuscitation Phase of Extracorporeal Cardiopulmonary Resuscitation: A 15-Year Retrospective Observational Study. *Crit Care Med*. 2019;47(11):1549–56.
7. Inoue A, Hifumi T, Sakamoto T, Kuroda Y. Extracorporeal Cardiopulmonary Resuscitation for Out-of-Hospital Cardiac Arrest in Adult Patients. *J Am Heart Assoc [Internet]*. 2020 Apr 9 [cited 2021 Jul 23];9(7):15291. Available from: [/pmc/articles/PMC7428656/](https://pubmed.ncbi.nlm.nih.gov/34811111/)
8. Al-Kawaz MN, Canner J, Caturegli G, Kannapadi N, Balucani C, Shelley L, et al. Duration of Hyperoxia and Neurologic Outcomes in Patients Undergoing Extracorporeal Membrane Oxygenation. *Crit Care Med [Internet]*. 2021 Oct [cited 2021 Oct 19];49(10):e968–77. Available from: [https://journals.lww.com/ccmjournal/Fulltext/2021/10000/Duration\\_of\\_Hyperoxia\\_and\\_Neurologic\\_Outcomes\\_in.38.aspx](https://journals.lww.com/ccmjournal/Fulltext/2021/10000/Duration_of_Hyperoxia_and_Neurologic_Outcomes_in.38.aspx)
9. Wilcox C, Choi CW, Cho S-M. Brain injury in extracorporeal cardiopulmonary resuscitation: translational to clinical research. *J Neurocritical Care [Internet]*. 2021 Sep 9 [cited 2021 Dec 21]; Available from: <http://www.e-jnc.org/journal/view.php?number=347>
10. Xie A, Lo P, Yan TD, Forrest P. Neurologic Complications of Extracorporeal Membrane Oxygenation: A Review. *J Cardiothorac Vasc Anesth [Internet]*. 2017;31(5):1836–46. Available from: <http://dx.doi.org/10.1053/j.jvca.2017.03.001>
11. Cho SM, Canner J, Chiarini G, Calligy K, Caturegli G, Rycus P, et al. Modifiable risk factors and mortality from ischemic and hemorrhagic strokes in patients

- receiving venoarterial extracorporeal membrane oxygenation: Results from the extracorporeal life support organization registry. *Crit Care Med* [Internet]. 2020 Oct [cited 2021 Jan 25];48(10):E897–905. Available from: <https://journals.lww.com/10.1097/CCM.0000000000004498>
12. HARPER AM, BELL RA. The effect of metabolic acidosis and alkalosis on the blood flow through the cerebral cortex. *J Neurol Neurosurg Psychiatry* [Internet]. 1963 [cited 2021 Mar 15];26(4):341–4. Available from: <https://www.ncbi.nlm.nih.gov/pmc/articles/PMC495594/>
  13. Dulla CG, Dobelis P, Pearson T, Frenguelli BG, Staley KJ, Masino SA. Adenosine and ATP link PCO<sub>2</sub> to cortical excitability via pH. *Neuron* [Internet]. 2005 [cited 2021 Mar 15];48(6):1011–23. Available from: <http://www.neuron.org/cgi/content/>
  14. Hafner S, Beloncle F, Koch A, Radermacher P, Asfar P. Hyperoxia in intensive care, emergency, and peri-operative medicine: Dr. Jekyll or Mr. Hyde? A 2015 update. *Ann Intensive Care* 2015 51 [Internet]. 2015 Nov 19 [cited 2021 Jul 25];5(1):1–14. Available from: <https://annalsofintensivecare.springeropen.com/articles/10.1186/s13613-015-0084-6>
  15. Tonna J, Selzman C, Bartos J, Ou Z, Jo Y, Becker LB, et al. Abstract 12990: The Association of Modifiable Mechanical Ventilation Settings, Blood Gas Changes and Survival After Extracorporeal Cardiopulmonary Resuscitation. *Circulation* [Internet]. 2021 Nov 16 [cited 2022 Feb 17];144(Suppl\_2). Available from: [https://www.ahajournals.org/doi/abs/10.1161/circ.144.suppl\\_2.12990](https://www.ahajournals.org/doi/abs/10.1161/circ.144.suppl_2.12990)
  16. ECLS Registry Report - October 2021. Ann Arbor; 2021 Oct.

17. Extracorporeal Life Support Organization (ELSO) Registry Data Definitions [Internet]. 2018 [cited 2021 Dec 30]. Available from:  
<https://www.else.org/Portals/0/Files/PDF/ELSO Database Definitions 2018-2-1.pdf>
18. Cuzick J. A wilcoxon-type test for trend. *Stat Med* [Internet]. 1985 Jan 1 [cited 2021 Dec 18];4(1):87–90. Available from:  
<https://onlinelibrary.wiley.com/doi/full/10.1002/sim.4780040112>
19. Koen 'T Joncke, Nathanaël T, Philippe D. A systematic review of current ECPR protocols. A step towards standardisation. *Resusc Plus* [Internet]. 2020 Sep [cited 2022 Feb 3];3:100018. Available from:  
<https://pubmed.ncbi.nlm.nih.gov/34223301/>
20. Roberts BW, Kilgannon JH, Hunter BR, Puskarich MA, Pierce L, Donnino M, et al. Association Between Early Hyperoxia Exposure After Resuscitation From Cardiac Arrest and Neurological Disability: Prospective Multicenter Protocol-Directed Cohort Study. *Circulation* [Internet]. 2018 [cited 2021 Jul 25];137(20):2114–24. Available from:  
<https://www.ahajournals.org/doi/abs/10.1161/CIRCULATIONAHA.117.032054>
21. Munshi L, Kiss A, Cypel M, Keshavjee S, Ferguson ND, Fan E. Oxygen Thresholds and Mortality During Extracorporeal Life Support in Adult Patients. *Crit Care Med* [Internet]. 2017 Dec [cited 2021 Mar 12];45(12):1997–2005. Available from: <http://journals.lww.com/00003246-201712000-00005>
22. Richards EM, Fiskum G, Rosenthal RE, Hopkins I, McKenna MC. Hyperoxic reperfusion after global ischemia decreases hippocampal energy metabolism. *Stroke* [Internet]. 2007 May [cited 2022 Feb 3];38(5):1578–84. Available from:

- <https://pubmed.ncbi.nlm.nih.gov/17413048/>
23. Hazelton JL, Balan I, Elmer GI, Kristian T, Rosenthal RE, Krause G, et al. Hyperoxic Reperfusion after Global Cerebral Ischemia Promotes Inflammation and Long-Term Hippocampal Neuronal Death. *J Neurotrauma* [Internet]. 2010 Apr 15 [cited 2022 Feb 3];27(4):753–62. Available from: <https://www.liebertpub.com/doi/abs/10.1089/neu.2009.1186>
  24. Diehl A, Burrell AJC, Udy AA, Alexander PMA, Rycus PT, Barbaro RP, et al. Association between Arterial Carbon Dioxide Tension and Clinical Outcomes in Venoarterial Extracorporeal Membrane Oxygenation. *Crit Care Med*. 2020;(5):977–84.
  25. Eastwood GM, Schneider AG, Suzuki S, Peck L, Young H, Tanaka A, et al. Targeted therapeutic mild hypercapnia after cardiac arrest: A phase II multi-centre randomised controlled trial (the CCC trial). *Resuscitation* [Internet]. 2016 Jul 1 [cited 2022 Feb 3];104:83–90. Available from: <https://pubmed.ncbi.nlm.nih.gov/27060535/>
  26. Shou BL, Ong CS, Zhou AL, Etchill E, Choi CW, Whitman GJR, et al. Arterial Carbon Dioxide Tension and Acute Brain Injury in Venoarterial Extracorporeal Membrane Oxygenation. In: *European Society for Cardio-Thoracic Surgery 35th Annual Meeting*. 2021.
  27. Bembea MM, Lee R, Masten D, Kibler KK, Lehmann CU, Brady KM, et al. Magnitude of arterial carbon dioxide change at initiation of extracorporeal membrane oxygenation support is associated with survival. *J Extracorp Technol* [Internet]. 2013;45(1):26–32. Available from:



<https://pubmed.ncbi.nlm.nih.gov/23691781>

<https://www.ncbi.nlm.nih.gov/pmc/articles/PMC4557460/>

28. Daou O, Winiszewski H, Besch G, Pili-Floury S, Belon F, Guillon B, et al. Initial pH and shockable rhythm are associated with favorable neurological outcome in cardiac arrest patients resuscitated with extracorporeal cardiopulmonary resuscitation. *J Thorac Dis [Internet]*. 2020 Mar 1 [cited 2022 Feb 7];12(3):849–57. Available from: <https://pubmed.ncbi.nlm.nih.gov/32274152/>
29. Cho SM, Canner J, Caturegli G, Choi CW, Etchill E, Giuliano K, et al. Risk Factors of Ischemic and Hemorrhagic Strokes during Venovenous Extracorporeal Membrane Oxygenation: Analysis of Data from the Extracorporeal Life Support Organization Registry. *Crit Care Med*. 2020;91–101.
30. Horn JW, Feng T, Mørkedal B, Strand LB, Horn J, Mukamal K, et al. Obesity and Risk for First Ischemic Stroke Depends on Metabolic Syndrome: The HUNT Study. *Stroke [Internet]*. 2021 [cited 2022 Feb 7];3555–61. Available from: <https://www.ahajournals.org/doi/abs/10.1161/STROKEAHA.120.033016>
31. Kurth T, Gaziano JM, Berger K, Kase CS, Rexrode KM, Cook NR, et al. Body Mass Index and the Risk of Stroke in Men. *JAMA Intern Med [Internet]*. 2002 Dec 9 [cited 2022 Feb 7];162(22):2557–62. Available from: <https://jamanetwork.com/journals/jamainternalmedicine/fullarticle/754810>
32. Yu HY, Wang CH, Chi NH, Huang SC, Chou HW, Chou NK, et al. Effect of interplay between age and low-flow duration on neurologic outcomes of extracorporeal cardiopulmonary resuscitation. *Intensive Care Med [Internet]*. 2019 Jan 1 [cited 2022 Feb 3];45(1):44–54. Available from:

<https://pubmed.ncbi.nlm.nih.gov/30547322/>

33. Iacobelli R, Fletcher-Sandersjö A, Lindblad C, Keselman B, Thelin EP, Broman LM. Predictors of brain infarction in adult patients on extracorporeal membrane oxygenation: an observational cohort study. *Sci Rep [Internet]*. 2021 Dec 1 [cited 2022 Feb 7];11(1). Available from: <https://pubmed.ncbi.nlm.nih.gov/33589664/>
34. Ong CS, Etchill E, Dong J, Shou BL, Shelley L, Giuliano K, et al. Neuromonitoring Detects Brain Injury in Patients on Extracorporeal Membrane Oxygenation Support. *J Thorac Cardiovasc Surg [Internet]*. 2021 Oct [cited 2021 Nov 2];0(0). Available from: <http://www.jtcvs.org/article/S0022522321015087/fulltext>

## Tables

**Table 1.** Demographics, clinical characteristics, and extracorporeal membrane oxygenation characteristics for extracorporeal cardiopulmonary resuscitation patients who had acute brain injury (ABI) versus those who did not.

|                                               | Total<br>(n=3,125) | No ABI<br>(n=2,637, 84.4%) | ABI<br>(n=488, 15.6%) | p value |
|-----------------------------------------------|--------------------|----------------------------|-----------------------|---------|
| Age (years)                                   | 58 (47-67)         | 59 (48-67)                 | 54 (43-64)            | <0.001  |
| Female sex                                    | 961 (31%)          | 814 (31%)                  | 147 (30%)             | 0.79    |
| Weight (kg)                                   | 81 (70-97)         | 80 (70-96)                 | 84 (70-100)           | 0.10    |
| Race                                          |                    |                            |                       | 0.03    |
| White                                         | 1,789 (57%)        | 1,541 (58%)                | 248 (51%)             |         |
| Asian                                         | 627 (20%)          | 519 (20%)                  | 108 (22%)             |         |
| Black                                         | 274 (9%)           | 221 (8%)                   | 53 (11%)              |         |
| Hispanic                                      | 114 (4%)           | 92 (3%)                    | 22 (5%)               |         |
| Other                                         | 235 (8%)           | 191 (7%)                   | 44 (9%)               |         |
| Comorbidity                                   |                    |                            |                       |         |
| Diabetes                                      | 304 (10%)          | 253 (10%)                  | 51 (10%)              | 0.56    |
| Hypertension                                  | 234 (7%)           | 189 (7%)                   | 45 (9%)               | 0.11    |
| Atrial fibrillation                           | 132 (4%)           | 107 (4%)                   | 25 (5%)               | 0.28    |
| Cardiomyopathy                                | 280 (9%)           | 235 (9%)                   | 45 (9%)               | 0.83    |
| COPD                                          | 96 (3%)            | 79 (3%)                    | 17 (3%)               | 0.57    |
| Pre-ECMO mean blood pressure (mmHg)           | 57 (41-72)         | 57 (42-71)                 | 56 (40-75)            | 0.87    |
| <b>Pre-ECMO ABG</b>                           |                    |                            |                       |         |
| pH                                            | 7.17 (7.02-7.29)   | 7.18 (7.02-7.30)           | 7.11 (6.97-7.25)      | <0.001  |
| HCO <sub>3</sub> <sup>-</sup> (mEq/L)         | 18 (13-22)         | 18 (14-22)                 | 17 (13-21)            | 0.003   |
| PaO <sub>2</sub>                              | 76 (57-112)        | 77 (57-112)                | 73 (54-108)           | 0.018   |
| PaCO <sub>2</sub>                             | 49 (38-63)         | 48 (38-62)                 | 51 (40-66)            | 0.013   |
| Lactate (mmol/L)                              | 10.0 (5.6-14.3)    | 9.9 (5.3-14.0)             | 11.6 (7.4-15.4)       | <0.001  |
| <b>Pre-ECMO ABG O<sub>2</sub> Categories</b>  |                    |                            |                       | 0.0     |
| Hypoxia (<60 mmHg)                            | 900 (29%)          | 737 (28%)                  | 163 (33%)             |         |
| Normoxia (60-119 mmHg)                        | 1,526 (49%)        | 1,300 (49%)                | 226 (46%)             |         |
| Mild hyperoxia (120-199 mmHg)                 | 451 (14%)          | 382 (14%)                  | 69 (14%)              |         |
| Moderate hyperoxia (200-299 mmHg)             | 248 (8%)           | 218 (8%)                   | 30 (6%)               |         |
| Severe hyperoxia (≥300 mmHg)                  | 0 (0%)             | 0 (0%)                     | 0 (0%)                |         |
| <b>Pre-ECMO ABG CO<sub>2</sub> Categories</b> |                    |                            |                       | <0.001  |
| Hypocarbica (<35 mmHg)                        | 506 (16%)          | 431 (16%)                  | 75 (15%)              |         |
| Normocarbica (35-44 mmHg)                     | 760 (24%)          | 645 (24%)                  | 115 (24%)             |         |
| Mild hypercarbica (45-54 mmHg)                | 665 (21%)          | 592 (22%)                  | 73 (15%)              |         |
| Severe hypercarbica (≥55 mmHg)                | 1,194 (38%)        | 969 (37%)                  | 225 (46%)             |         |
| <b>Post-ECMO ABG (24 hrs)</b>                 |                    |                            |                       |         |
| pH                                            | 7.41 (7.35-7.46)   | 7.41 (7.35-7.46)           | 7.40 (7.35-7.45)      | 0.64    |
| HCO <sub>3</sub> <sup>-</sup> (mEq/L)         | 24 (20-26)         | 24 (20-26)                 | 23 (20-26)            | 0.70    |
| PaO <sub>2</sub>                              | 138 (89-257)       | 133 (88-250)               | 156 (99-305)          | <0.001  |

|                                                |                |                |                |        |
|------------------------------------------------|----------------|----------------|----------------|--------|
| PaCO <sub>2</sub>                              | 37 (33-42)     | 37 (33-42)     | 37 (32-42)     | 0.97   |
| Lactate (mmol/L)                               | 3.4 (1.8-7.2)  | 3.3 (1.8-7.2)  | 3.8 (2.1-7.0)  | 0.21   |
| <b>Post-ECMO ABG O<sub>2</sub> Categories</b>  |                |                |                | 0.003  |
| Hypoxia (<60 mmHg)                             | 130 (4%)       | 104 (4%)       | 26 (5%)        |        |
| Normoxia (60-119 mmHg)                         | 904 (29%)      | 779 (30%)      | 125 (26%)      |        |
| Mild hyperoxia (120-199 mmHg)                  | 583 (19%)      | 494 (19%)      | 89 (18%)       |        |
| Moderate hyperoxia (200-299 mmHg)              | 336 (11%)      | 274 (10%)      | 62 (13%)       |        |
| Severe hyperoxia (≥300 mmHg)                   | 501 (16%)      | 394 (15%)      | 107 (22%)      |        |
| <b>Post-ECMO ABG CO<sub>2</sub> Categories</b> |                |                |                | 0.97   |
| Hypocarbica (<35 mmHg)                         | 831 (27%)      | 692 (26%)      | 139 (28%)      |        |
| Normocarbica (35-44 mmHg)                      | 1,228 (39%)    | 1,020 (39%)    | 208 (43%)      |        |
| Mild hypercarbica (45-54 mmHg)                 | 321 (10%)      | 270 (10%)      | 51 (10%)       |        |
| Severe hypercarbica (≥55 mmHg)                 | 58 (2%)        | 49 (2%)        | 9 (2%)         |        |
| Delta PaO <sub>2</sub> (mmHg)                  | 53 (1-171)     | 50 (0-157)     | 84 (14-216)    | <0.001 |
| Relative delta PaO <sub>2</sub> (%)            | 73 (1-231)     | 67 (0-210)     | 112 (18-314)   | <0.001 |
| Delta PaCO <sub>2</sub> (mmHg)                 | -11 (-25 - -1) | -11 (-24 - -1) | -12 (-28 - -2) | 0.04   |
| Relative delta PaCO <sub>2</sub> (%)           | -23 (-41 - -2) | -23 (-41 - -2) | -26 (-43 - -5) | 0.080  |
| Days on ECMO support                           | 3.0 (1.0-5.9)  | 2.9 (0.9-5.9)  | 3.2 (1.5-6.0)  | <0.001 |
| Additional mechanical support device           | 512 (16%)      | 429 (16%)      | 83 (17%)       | 0.69   |
| <b>ECMO complications</b>                      |                |                |                |        |
| ECMO circuit mechanical failure                | 435 (14%)      | 356 (14%)      | 79 (16%)       | 0.12   |
| Renal replacement therapy                      | 834 (27%)      | 648 (25%)      | 186 (38%)      | <0.001 |
| Glucose < 40 mg/L                              | 21 (1%)        | 13 (0%)        | 8 (2%)         | 0.004  |
| Hemolysis                                      | 82 (3%)        | 62 (2%)        | 20 (4%)        | 0.03   |
| Cardiac arrhythmia                             | 455 (15%)      | 364 (14%)      | 91 (19%)       | 0.005  |
| Gastrointestinal hemorrhage                    | 151 (5%)       | 124 (5%)       | 27 (6%)        | 0.43   |
| Disseminated intravascular coagulation         | 62 (2%)        | 48 (2%)        | 14 (3%)        | 0.13   |
| <b>Outcomes</b>                                |                |                |                |        |
| Survival                                       | 980 (31%)      | 922 (35%)      | 58 (12%)       | <0.001 |

Continuous values are represented as # (interquartile range) and categorical variables are represented as n (%). Blood gasses have units of mmHg unless otherwise noted. Abbreviations – COPD: chronic obstructive pulmonary disease; ECPR: extracorporeal cardiopulmonary resuscitation; ECMO: extracorporeal membrane oxygenation; ABG: arterial blood gas; PaO<sub>2</sub>: arterial oxygen level; PaCO<sub>2</sub>: arterial carbon dioxide level. “Additional mechanical support device” includes left and right ventricular assist devices (VAD), intra-aortic balloon pumps, and percutaneous VADs. Delta PaO<sub>2</sub> = Post-ECLS PaO<sub>2</sub> minus Pre-ECLS PaO<sub>2</sub>. Delta PaCO<sub>2</sub> = Post-ECLS PaCO<sub>2</sub> minus Pre-ECLS PaCO<sub>2</sub>. “Other” race is defined as a separate category in the ELSO database.

Fields with physiologically improbable values were treated as missing: pH>8 or <6.5, PaO<sub>2</sub>>760, and PaCO<sub>2</sub>>240 or <20 mmHg. Missing variables for some variables result in different denominators, listed here: male sex (n=3,104), weight (n=3,032), race (n=3,039), pre-ECLS pH (n=3,113), HCO<sub>3</sub><sup>-</sup> (n=2,965), and lactate (n=1,592), post-ECLS pH (n=2,458), HCO<sub>3</sub><sup>-</sup> (n=2,421), PaO<sub>2</sub> (n=2,454), PaCO<sub>2</sub> (n=2,438), and lactate (n=1,405), delta PaO<sub>2</sub> (n=2,454), delta PaCO<sub>2</sub> (n=2,438), and pre-ECLS mean blood pressure (n=1,971).

**Table 2.** Factors associated with composite acute brain injury by multivariable logistic regression. C-statistic for model is 0.67. Variables with a  $p < 0.05$  are bolded.

|                                                | Multivariable |                  |              |
|------------------------------------------------|---------------|------------------|--------------|
|                                                | aOR           | 95% CI           | p value      |
| Age (by 10 years)                              | 0.92          | 0.82-1.02        | 0.11         |
| Race                                           |               |                  |              |
| White                                          | Reference     |                  |              |
| Black                                          | 1.55          | 0.92-2.62        | 0.10         |
| Hispanic                                       | 1.79          | 0.83-3.90        | 0.14         |
| Asian                                          | 0.91          | 0.58-1.41        | 0.66         |
| Other                                          | 1.54          | 0.98-2.42        | 0.06         |
| <b>Decreasing pH (per 0.1 units), pre-ECMO</b> | <b>1.13</b>   | <b>1.03-1.25</b> | <b>0.01</b>  |
| Lactate, pre-ECMO                              | 1.01          | 0.99-1.04        | 0.34         |
| PaO <sub>2</sub> , pre-ECMO                    |               |                  |              |
| <b>Hypoxia (&lt;60 mmHg)</b>                   | <b>1.46</b>   | <b>1.03-2.08</b> | <b>0.04</b>  |
| Normoxia (60-120 mmHg)                         | Reference     |                  |              |
| Mild hyperoxia (120-199 mmHg)                  | 1.13          | 0.71-1.80        | 0.62         |
| Moderate hyperoxia (200-299 mmHg)              | 0.86          | 0.45-1.63        | 0.64         |
| PaCO <sub>2</sub> , pre-ECMO                   |               |                  |              |
| Hypocarbica (<35 mmHg)                         | 0.86          | 0.50-1.48        | 0.59         |
| Normocarbica (35-44 mmHg)                      | Reference     |                  |              |
| Mild hypercarbica (45-54 mmHg)                 | 0.72          | 0.44-1.17        | 0.18         |
| Severe hypercarbica (≥55 mmHg)                 | 0.94          | 0.61-1.45        | 0.76         |
| PaO <sub>2</sub> , on-ECMO                     |               |                  |              |
| Hypoxia (<60 mmHg)                             | 1.32          | 0.66-2.66        | 0.43         |
| Normoxia (60-120 mmHg)                         | Reference     |                  |              |
| Mild hyperoxia (120-199 mmHg)                  | 1.28          | 0.85-1.91        | 0.24         |
| Moderate hyperoxia (200-299 mmHg)              | 1.34          | 0.83-2.17        | 0.24         |
| <b>Severe hyperoxia (≥300 mmHg)</b>            | <b>1.55</b>   | <b>1.02-2.36</b> | <b>0.04</b>  |
| <b>Renal replacement therapy</b>               | <b>1.70</b>   | <b>1.22-2.37</b> | <b>0.002</b> |
| Hemolysis                                      | 1.47          | 0.64-3.35        | 0.36         |
| Arrhythmia                                     | 1.34          | 0.89-2.04        | 0.17         |

Abbreviations – ECMO: extracorporeal membrane oxygenation. PaO<sub>2</sub>: arterial oxygen level; PaCO<sub>2</sub>: arterial carbon dioxide level. Addition of delta PaO<sub>2</sub> and CO<sub>2</sub> parameters (both raw values and relative percentages) degraded model performance compared to using only the categorized variables and were consequently excluded from the final model.

## Figures

**Figure 1.** Trends in the (a) utilization of extracorporeal cardiopulmonary resuscitation (ECPR) and incidence of acute brain injury (ABI), and (b) for the incidence of individual ABI types. Trends were assessed using Cuzick's non-parametric trend test. Annual ECPR volume has increased ( $p$ -trend=0.003) while incidence of ABI has decreased ( $p$ -trend=0.023). Incidence of brain death decreased and ischemic stroke increased, while incidence of ICH and seizure have not changed over time.

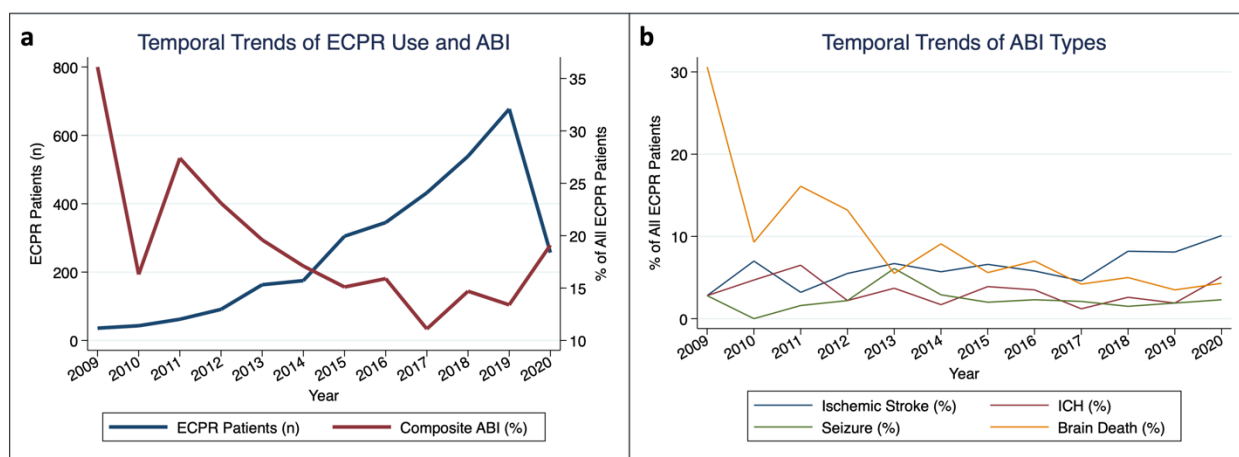

**Figure 2.** Histograms for (a) on-ECMO PaO<sub>2</sub> and (b) on-ECMO PaCO<sub>2</sub>. Abbreviations – ECMO: extracorporeal membrane oxygenation.

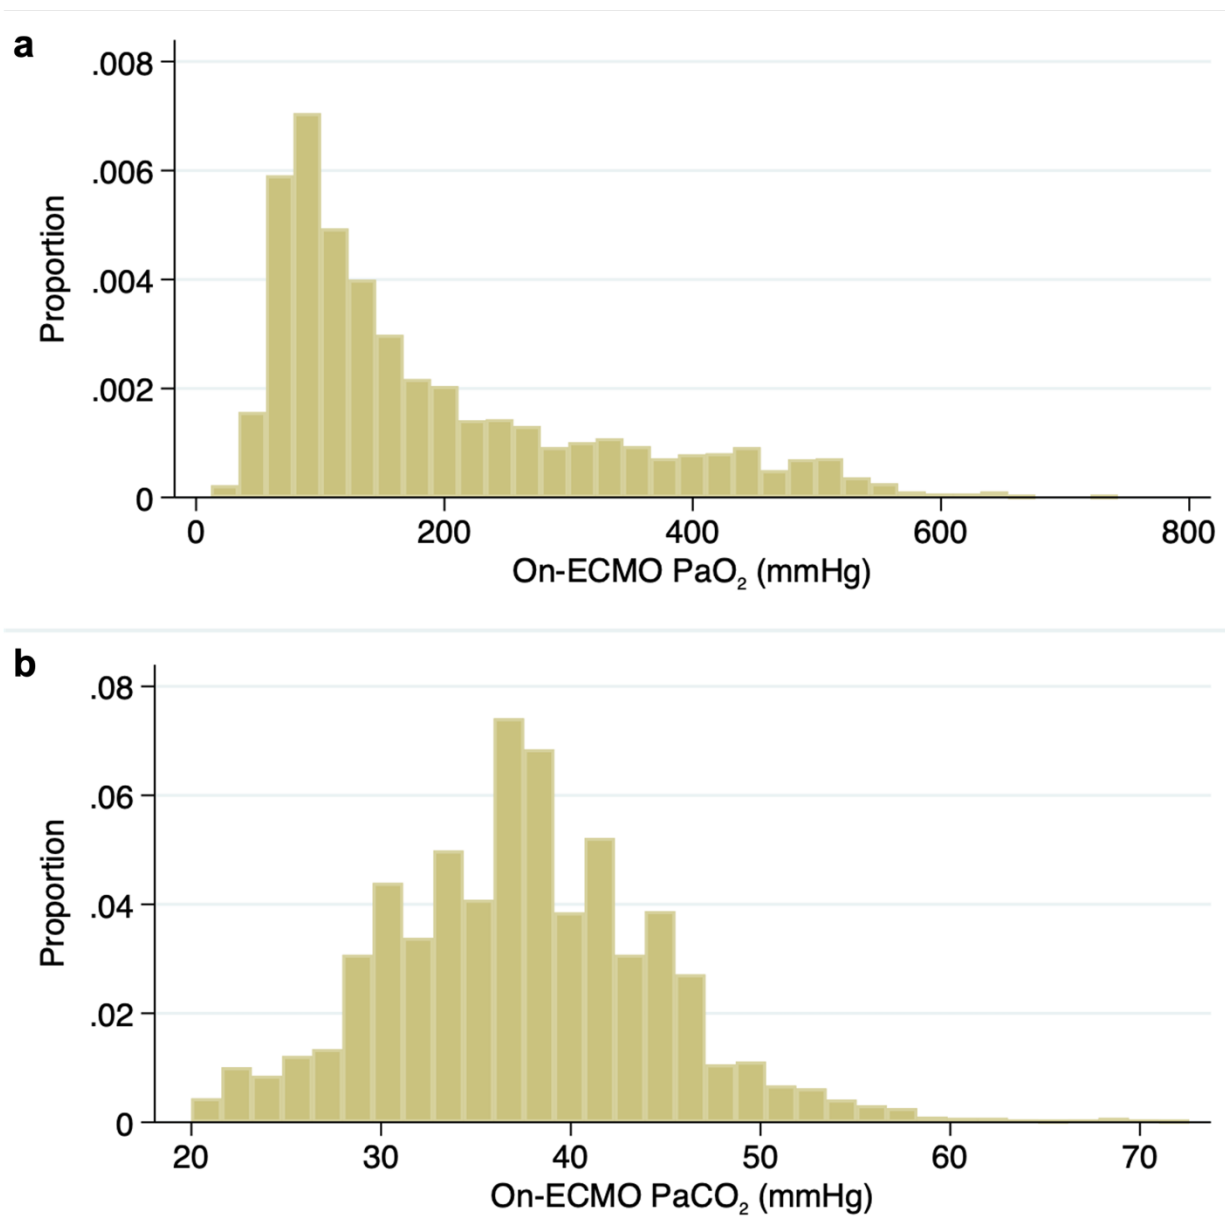

**Figure 3.** Forest plot for multivariable model of (a) acute brain injury (ABI), (c) ischemic stroke, and (c) intracranial hemorrhage (ICH). Dot represents adjusted odds ratio and brackets represent the 95% confidence intervals. Asterisks mark variables with a  $p < 0.05$ .

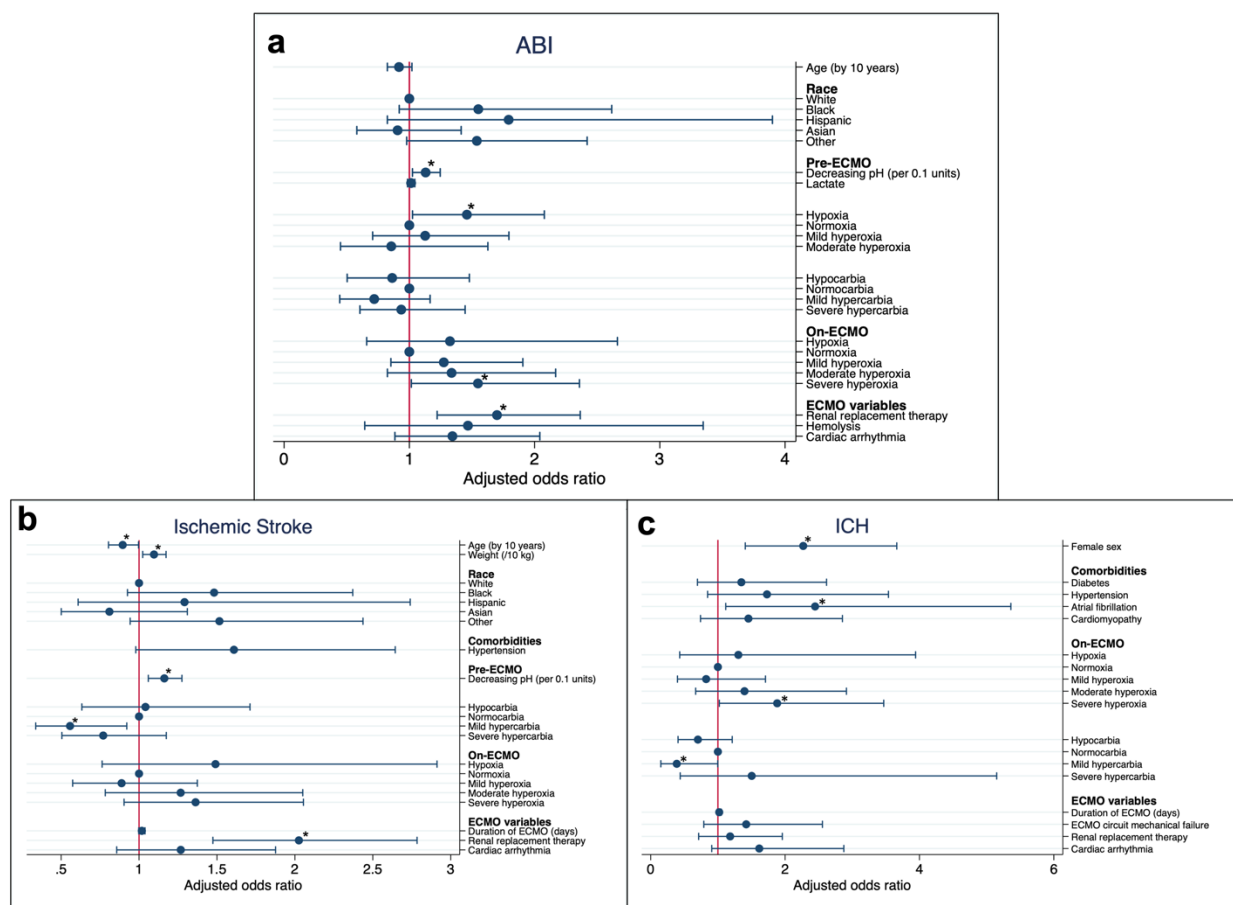

Source: https://medrxiv.org/content/10.1101/2022.03.10.22272203v1.full.pdf
